# Supplementary material
Source: Research Square preprint supplement (doi:10.21203/rs.3.rs-7731507/v1)
Supplement: Supplementary file 1 [file 589edaadc9eee0f839c22331.docx]

**Table 1** State-wise distribution of component of borrowing with respect to types of interest rates

| **States** | **2005 (Pre-OOPE)**  **N=1081** | | | **2012 (Pre-OOPE)**  **N=2243** | | |
| --- | --- | --- | --- | --- | --- | --- |
| **With interest**  **(N=864)** | | **Without interest**  **(N=217)** | **With interest**  **(N=1439)** | | **Without interest**  **(N =804)** |
| **Institutional**  **(N=595)** | **Non-institutional (N=269)** |  | **Institutional**  **(N=904)** | **Non-Institutional**  **(N=535)** |  |
| **Jammu & Kashmir** | 0 | 0 | 0 | 0.22 (2) | 0.19(1) | 2.86(23) |
| **Himachal Pradesh** | 1.18 (7) | 2.60(7) | 3.69 (8) | 1.88 (17) | 0.93(5) | 3.61 (29) |
| **Punjab** | 2.86 (17) | 1.12 (3) | 0 | 3.43 (31) | 3.93(21) | 5.85(47) |
| **Chandigarh** | 0 | 0 | 0 | 0.11 (1) |  | 0.12(1) |
| **Uttarakhand** | 1.01 (6) | 1.12 (3) | 1.84 (4) | 0.55 (5) | 0.37(2) | 1.00(8) |
| **Haryana** | 2.02 (12) | 1.12 (3) | 0 | 2.99 (27) | 1.50(8) | 3.11(25) |
| **Delhi** | 0.17 (1) | 0 | 0 | 0.44 (4) | 1.68(9) | 1.12(9) |
| **Rajasthan** | 5.04 (30) | 8.55 (23) | 4.15 (9) | 5.86 (53) | 5.79(31) | 1.49(12) |
| **Uttar Pradesh** | 12.44 (74) | 8.55 (23) | 24.88 (54) | 13.17 (119) | 17.38(93) | 29.10(234) |
| **Bihar** | 12.61 (75) | 3.72 (10) | 13.82 (30) | 9.51 (86) | 5.79(31) | 5.60(45) |
| **Sikkim** | 0 | 0 | 0 | 0.11 (1) | 0.19(1) | 0.62(5) |
| **Manipur** | 0 | 0 | 0 | 0.44 (4) | 0.19(1) | 0 |
| **Assam** | 0 | 0 | 0 | 0.11 (1) | 0.19(1) | 0 |
| **West Bengal** | 6.72(40) | 2.97(8) | 9.22 (20) | 6.97 (63) | 8.78(47) | 11.32(91) |
| **Jharkhand** | 0.84 (5) | 0.74(2) | 0.92(2) | 0.44 (4) | 1.31(7) | 1.00(8) |
| **Orissa** | 4.37 (26) | 2.97(8) | 4.61 (10) | 3.87 (35) | 2.24(12) | 0.87(7) |
| **Chhattisgarh** | 1.85(11) | 4.46 (12) | 3.23 (7) | 3.43(31) | 3.36(18) | 7.34(59) |
| **Madhya Pradesh** | 10.08 (60) | 18.96(51) | 7.37 (16) | 8.85(80) | 17.20(92) | 8.71(70) |
| **Gujarat** | 1.34 (8) | 1.86 (5) | 9.68 (21) | 0.77(7) | 3.74(20) | 5.35(43) |
| **Daman & Diu** | 0 | 0 | 1.84(4) | 0 | 0.19(1) | 1.00(8) |
| **Dadar & Nagar Haveli** | 0.17 (1) | 0 | 0 | 0 | 0 | 0.12(1) |
| **Maharashtra** | 1.01 (6) | 6.32(17) | 5.07 (11) | 1.88(17) | 2.06(11) | 3.36(27) |
| **Andhra Pradesh** | 13.28 (79) | 15.24(41) | 2.30 (5) | 8.74(79) | 6.92(37) | 0.12(1) |
| **Karnataka** | 10.08(60) | 5.20(14) | 4.61 (10) | 11.83(107) | 12.34 (66) | 4.35(35) |
| **Kerala** | 4.03 (24) | 4.46(12) | 0.92 (2) | 5.64(51) | 1.87 (10) | 1.12(9) |
| **Tamil Nadu** | 8.57 (51) | 8.92 (24) | 1.84 (4) | 7.85(71) | 1.87(10) | 0.87(7) |
| **Tripura** | 0.17 (1) | 0 | 0 | 0 | 0 | 0 |
| **Pondicherry** | 0 | 1.12(3) | 0 | 0.88(8) | 0 | 0 |
